# Supplementary material for: Groundwater Recharge and Hydrogeochemical Evolution in Leizhou Peninsula, China
Source: Hindawi journal article supplement (doi:10.1155/2015/427579), 2015-01-01
Supplement: f1 [file 427579.f1.pdf]

Supplementary Table 1. Chemical composition of groundwater and surface water in Leizhou Peninsula

| Sample | Water type  | Na <sup>+</sup><br>(mg/l) | K <sup>+</sup><br>(mg/l) | Ca <sup>2+</sup><br>(mg/l) | Mg <sup>2+</sup><br>(mg/l) | Cl <sup>-</sup><br>(mg/l) | SO <sub>4</sub> <sup>2-</sup><br>(mg/l) | HCO <sub>3</sub> <sup>-</sup><br>(mg/l) | NO <sub>3</sub> <sup>-</sup><br>(mg/l) | NH <sub>4</sub> <sup>+</sup><br>(mg/l) | TDS<br>(mg/l) | EC<br>(μS/cm) | δ <sup>18</sup> O<br>‰ | δD<br>‰ |
|--------|-------------|---------------------------|--------------------------|----------------------------|----------------------------|---------------------------|-----------------------------------------|-----------------------------------------|----------------------------------------|----------------------------------------|---------------|---------------|------------------------|---------|
| D1     | Lake        | 5.24                      | 2.56                     | 6.52                       | 3.68                       | 11.4                      | 5.14                                    | 30.4                                    | n.d.                                   | 0.12                                   | 65.1          | 95.4          | -2.55                  | -30     |
| D2     | Lake        | 4.15                      | 1.82                     | 4.30                       | 2.29                       | 9.82                      | 3.28                                    | 15.5                                    | 2.19                                   | 0.09                                   | 44.0          | 59.0          | -5.42                  | -45     |
| D3     | Lake        | 9.38                      | 3.08                     | 5.02                       | 3.73                       | 15.6                      | 5.78                                    | 30.6                                    | 2.01                                   | 0.9                                    | 76.1          | 102           | n.d.                   | n.d.    |
| D4     | Lake        | 8.89                      | 1.09                     | 2.54                       | 1.59                       | 19.4                      | 0.68                                    | n.d.                                    | 9.56                                   | 0.19                                   | 44.4          | 76.0          | -3.85                  | -37     |
| D5     | Lake        | 7.79                      | 2.00                     | 6.95                       | 5.30                       | 12.8                      | 4.4                                     | 44.0                                    | n.d.                                   | n.d.                                   | 83.2          | 113           | -7.19                  | -59     |
| D6     | Lake        | 9.26                      | 2.85                     | 7.99                       | 4.91                       | 16.4                      | 6.87                                    | 39.2                                    | 1.85                                   | n.d.                                   | 89.4          | 123           | n.d.                   | n.d.    |
| G1     | Groundwater | 6.06                      | 2.94                     | 8.24                       | 1.79                       | 11.9                      | 3.35                                    | 12.6                                    | 17.7                                   | n.d.                                   | 64.6          | 87.0          | -7.81                  | -48     |
| G2     | Groundwater | 8.09                      | 2.11                     | 5.62                       | 1.59                       | 10.8                      | 1.56                                    | 5.23                                    | 24.4                                   | n.d.                                   | 59.4          | 90.0          | -7.24                  | -52     |
| G3     | Groundwater | 16.4                      | 4.36                     | 15.26                      | 3.13                       | 23.8                      | 5.08                                    | n.d.                                    | 71.5                                   | n.d.                                   | 140           | 220           | n.d.                   | n.d.    |
| G4     | Groundwater | 7.45                      | 1.41                     | 2.96                       | 1.16                       | 10.9                      | n.d.                                    | 0.49                                    | 17.8                                   | n.d.                                   | 42.2          | 74.0          | n.d.                   | n.d.    |
| G5     | Groundwater | 3.65                      | 3.19                     | 7.32                       | 1.95                       | 6.98                      | 7.38                                    | 20.6                                    | 4.82                                   | n.d.                                   | 55.9          | 72.0          | -7.14                  | -49     |
| G6     | Groundwater | 5.71                      | 3.48                     | 13.5                       | 0.57                       | 4.91                      | 0.41                                    | 46.0                                    | 9.69                                   | n.d.                                   | 84.3          | 100           | n.d.                   | n.d.    |

|     |             |       |      |      |      |      |      |      |      |      |      |      |       |      |
|-----|-------------|-------|------|------|------|------|------|------|------|------|------|------|-------|------|
| G7  | Groundwater | 1.16  | 2.19 | 1.23 | 0.53 | 2.26 | 0.45 | 6.76 | 1.70 | n.d. | 16.3 | 24.0 | -4.85 | -36  |
| G8  | Groundwater | 37.9  | 27.2 | 32.5 | 10.7 | 87.2 | 10.3 | n.d. | 161  | n.d. | 367  | 540  | -8.25 | -60  |
| G9  | Groundwater | 5.34  | 1.00 | 11.9 | 3.21 | 13.2 | n.d. | 9.69 | 36.2 | n.d. | 80.5 | 125  | n.d.  | n.d. |
| G10 | Groundwater | 1.05  | 5.33 | 2.51 | 0.98 | 3.30 | 7.96 | 6.11 | 1.81 | n.d. | 29.1 | 320  | -6.81 | -53  |
| G11 | Groundwater | 3.25  | 3.71 | 6.17 | 1.25 | 4.90 | 11.4 | 15.8 | 3.35 | 0.75 | 50.5 | 69.0 | n.d.  | n.d. |
| G12 | Groundwater | 36.1  | 7.68 | 13.1 | 8.67 | 66.1 | 22.7 | n.d. | 64.3 | 2.73 | 221  | 360  | -6.78 | -52  |
| G13 | Groundwater | 5.52  | 9.31 | 3.43 | 2.61 | 3.89 | 6.93 | 38.2 | n.d. | 0.29 | 70.2 | 84.4 | n.d.  | n.d. |
| G14 | Groundwater | 84.7  | 9.93 | 37.7 | 8.46 | 159  | 0.69 | 23.6 | 115  | 3.87 | 442  | 650  | -7.31 | -56  |
| G15 | Groundwater | 1.89  | 5.94 | 1.14 | 1.39 | 3.44 | 7.15 | 9.75 | n.d. | n.d. | 30.7 | 41.0 | -6.67 | -51  |
| G16 | Groundwater | 4.92  | 10.3 | 18.6 | 5.12 | 9.09 | 20.7 | 74.0 | 1.77 | 1.83 | 146  | 167  | n.d.  | n.d. |
| G17 | Groundwater | 2.09  | 2.78 | 0.25 | 0.72 | 3.71 | 3.71 | 1.11 | 2.03 | n.d. | 16.4 | 30.0 | n.d.  | n.d. |
| G18 | Groundwater | 119.1 | 56.0 | 59.4 | 17.5 | 254  | 63.4 | 19.3 | 176  | 11.3 | 776  | 990  | -5.53 | -48  |
| G19 | Groundwater | 14.0  | n.d. | 8.23 | 2.54 | 23.4 | 0.06 | 21.6 | 15.5 | 0.65 | 85.8 | 120  | -6.63 | -49  |
| G20 | Groundwater | 24.0  | 3.27 | 21.4 | 13.5 | 23.4 | 6.27 | 152  | 5.36 | 1.25 | 251  | 290  | -5.32 | -53  |
| G21 | Groundwater | 14.7  | 1.19 | 3.24 | 5.27 | 21.9 | n.d. | n.d. | 40.8 | n.d. | 87.1 | 137  | n.d.  | n.d. |

|     |             |      |      |      |      |      |      |        |      |      |      |      |       |       |
|-----|-------------|------|------|------|------|------|------|--------|------|------|------|------|-------|-------|
| G22 | Groundwater | 0.59 | 1.95 | 0.60 | 0.81 | 2.62 | 0.68 | 5.64   | 1.03 | 0.45 | 14.4 | 22.0 | -6.55 | -50   |
| G23 | Groundwater | 4.17 | 6.66 | 2.14 | 2.00 | 6.77 | 5.84 | 18.9   | n.d. | n.d. | 46.5 | 70.0 | -7.45 | -57.5 |
| G24 | Groundwater | 6.63 | 5.67 | 3.41 | 3.05 | 3.04 | 4.53 | 45.2   | n.d. | 1.20 | 72.7 | 80.0 | n.d.  | n.d.  |
| G25 | Groundwater | 14.4 | 6.87 | 12.6 | 7.95 | 12.2 | 19.5 | 82.6   | n.d. | 0.36 | 156  | 207  | n.d.  | n.d.  |
| G26 | Groundwater | 9.31 | 3.91 | 34.7 | 10.5 | 3.78 | 5.99 | 174    | n.d. | n.d. | 243  | 260  | -7.70 | -58   |
| G27 | Groundwater | 9.82 | 7.62 | 1.63 | 2.98 | 27.7 | n.d. | 1.12   | 9.32 | n.d. | 60.1 | 108  | -5.36 | -46   |
| G28 | Groundwater | 45.4 | 3.68 | 11.4 | 10.1 | 85.9 | n.d. | n.d.   | 85.5 | 1.78 | 244  | 370  | -6.37 | -49   |
| G29 | Groundwater | 12.8 | 4.79 | 44.7 | 14.3 | 12.1 | 3.56 | 223    | n.d. | n.d. | 316  | 310  | -4.54 | -33   |
| G30 | Groundwater | 17.7 | 3.12 | 31.1 | 11.8 | 6.37 | 1.60 | 194    | n.d. | 0.47 | 267  | 282  | -6.50 | -51   |
| G31 | Groundwater | 45.9 | 4.49 | 23.5 | 8.03 | 3.14 | 1.70 | 232    | n.d. | n.d. | 320  | 310  | -5.45 | -36   |
| G32 | Groundwater | 10.3 | 2.57 | 25.0 | 9.66 | 7.74 | 4.85 | 136.38 | n.d. | n.d. | 196  | 230  | -2.57 | -25   |
| G33 | Groundwater | 5.37 | 3.42 | 32.2 | 10.4 | 5.31 | 6.15 | 153    | n.d. | 0.18 | 216  | 233  | -7.65 | -57   |
| G34 | Groundwater | 9.78 | 4.60 | 12.0 | 3.99 | 20.2 | 0.72 | 43.3   | 10.9 | n.d. | 105  | 144  | n.d.  | n.d.  |
| G35 | Groundwater | 21.0 | 3.60 | 21.5 | 10.3 | 10.5 | 0.26 | 160    | 4.75 | 1.47 | 234  | 290  | -7.55 | -54   |
| G36 | Groundwater | 13.6 | 2.14 | 19.2 | 14.1 | 10.1 | 4.51 | 145    | n.d. | n.d. | 209  | 240  | -5.37 | -42   |

|     |             |       |      |      |      |      |      |      |       |      |      |      |       |      |
|-----|-------------|-------|------|------|------|------|------|------|-------|------|------|------|-------|------|
| G37 | Groundwater | 23.4  | 3.66 | 25.0 | 9.10 | 8.48 | 0.11 | 174  | n.d.  | n.d. | 245  | 250  | -3.05 | -30  |
| G38 | Groundwater | 18.2  | 3.08 | 27.1 | 8.95 | 8.47 | 0.24 | 167  | n.d.  | 0.50 | 234  | 257  | n.d.  | n.d. |
| G39 | Groundwater | 55.0  | 4.35 | 26.5 | 10.7 | 7.64 | 0.09 | 284  | n.d.  | 3.21 | 392  | 350  | -6.45 | -48  |
| G40 | Groundwater | 17.3  | 3.03 | 17.4 | 15.5 | 12.9 | 2.35 | 159  | n.d.  | 0.96 | 229  | 270  | -7.51 | -60  |
| G41 | Groundwater | 9.94  | 1.51 | 9.33 | 7.15 | 16.7 | n.d. | 64.2 | 1.92  | 0.55 | 111  | 134  | n.d.  | n.d. |
| G42 | Groundwater | 24.5  | 3.66 | 23.4 | 18.1 | 66.7 | n.d. | 54.6 | 66.2  | 0.58 | 258  | 354  | -6.55 | -45  |
| G43 | Groundwater | n.d.  | 3.30 | 10.5 | 5.72 | 3.82 | 0.14 | 57.2 | 1.79  | n.d. | 82.4 | 450  | -6.02 | -45  |
| G44 | Groundwater | 21.4  | 2.07 | 38.8 | 18.8 | 37.1 | 20.4 | 163  | 19.2  | n.d. | 321  | 370  | -5.98 | -43  |
| G45 | Groundwater | 16.7  | 2.88 | 27.6 | 10.2 | 34.1 | 4.97 | 97.9 | 21.5  | n.d. | 216  | 290  | -6.50 | -45  |
| G46 | Groundwater | 13.6  | 2.81 | 14.7 | 14.9 | 21.3 | 0.01 | 110  | 16.1  | 1.00 | 195  | 250  | -5.9  | -46  |
| G47 | Groundwater | 14.6  | 8.58 | 19.2 | 15.6 | 34.8 | n.d. | 88.7 | 42.2  | 0.34 | 224  | 303  | n.d.  | n.d. |
| G48 | Groundwater | 105.2 | 6.40 | 6.31 | 4.78 | 5.79 | 4.30 | 494  | 3.37  | 53.7 | 685  | 694  | -6.20 | -50  |
| G49 | Groundwater | n.d.  | 4.76 | 45.6 | 32.5 | 442  | 48.8 | n.d. | 118.3 | 3.41 | 696  | 1320 | -6.35 | -50  |
| R1  | River       | 2.85  | 3.57 | 9.23 | 1.28 | 5.10 | 13.2 | 22.5 | 2.15  | 0.75 | 60.6 | 65.0 | n.d.  | n.d. |
| R2  | River       | 5.43  | 4.48 | 9.19 | 2.10 | 12.6 | 12.7 | 15.8 | 6.97  | 0.15 | 69.4 | 105  | -7.03 | -53  |

|     |       |      |      |      |      |      |      |       |      |      |      |      |       |      |
|-----|-------|------|------|------|------|------|------|-------|------|------|------|------|-------|------|
| R3  | River | 5.34 | 4.93 | 8.93 | 3.10 | 12.5 | 10.7 | 24.7  | 5.48 | 0.15 | 75.7 | 107  | n.d.  | n.d. |
| R4  | River | 5.80 | 4.16 | 7.49 | 2.03 | 15.8 | 7.90 | 9.01  | 9.28 | 0.16 | 61.7 | 93.2 | -6.05 | -49  |
| R5  | River | 4.61 | 3.25 | 9.12 | 1.70 | 10.4 | 9.75 | 19.7  | 6.36 | 0.75 | 65.6 | 77.0 | -6.04 | -46  |
| R6  | River | 4.01 | 5.58 | 14.1 | 1.71 | 14.5 | 19.3 | 17.6  | 4.29 | 0.17 | 81.2 | 122  | n.d.  | n.d. |
| R7  | River | 9.26 | 2.44 | 5.69 | 4.34 | 15.4 | 2.87 | 38.1  | 1.93 | 0.79 | 80.8 | 109  | -4.41 | -36  |
| R8  | River | 4.88 | 3.16 | 6.12 | 1.46 | 12.7 | 6.92 | 9.71  | 3.61 | n.d. | 48.5 | 78.0 | n.d.  | n.d. |
| R9  | River | 4.23 | 3.31 | 7.51 | 2.41 | 9.02 | 9.84 | 18.4  | 5.48 | 0.11 | 60.3 | 98.3 | n.d.  | n.d. |
| R10 | River | 1.11 | 6.12 | 0.06 | 0.77 | 2.69 | 5.79 | 4.57  | n.d. | n.d. | 21.1 | 33.0 | -6.15 | -50  |
| R11 | River | 8.21 | 2.80 | 22.6 | 19.9 | 14.5 | n.d. | 151.2 | 19.1 | n.d. | 238  | 280  | n.d.  | n.d. |
| R12 | River | 3.60 | 4.07 | 6.84 | 1.77 | 11.0 | 10.7 | 8.23  | 5.23 | 0.09 | 52.1 | 79.0 | n.d.  | n.d. |
| R13 | River | 3.98 | 3.91 | 4.28 | 2.00 | 11.1 | 4.96 | 12.5  | 4.70 | 0.83 | 48.3 | 70.0 | n.d.  | n.d. |
| R14 | River | 5.50 | 4.06 | 4.23 | 7.52 | 10.1 | 5.45 | 45.3  | 2.00 | n.d. | 84.2 | 96.0 | n.d.  | n.d. |
| R15 | River | 6.58 | 1.42 | 4.24 | 3.24 | 10.9 | 1.38 | 27.4  | 2.89 | 0.55 | 58.6 | 85.0 | n.d.  | n.d. |

---

\* n.d. denotes “not determined” because of low concentrations or insufficient material.
